# Supplementary material
Source: PubMed Central journal article supplement (PMC8464406)
Supplement: NIHMS1733424-supplement-ESM_Table_1.pdf [file NIHMS1733424-supplement-ESM_Table_1.pdf]

**ESM Table 1.**

**Primers for Real time Q-PCR**

|                       |                      |
|-----------------------|----------------------|
| UCP1F588R/641M        | GTGAAGGTCAGAATGCAAGC |
| UCP1R835R/888M        | GCTGACAGTAAATGGCAGGG |
| Ppard F1048m/1028r    | AGCTCACCGAGTTCGCCAAG |
| Ppard R1207m/1187r    | ACGAAGCCACTGCCGTTGG  |
| PGC1AlphaF931R/984M   | CTCCTCCTCATAAAGCCAAC |
| PGC1AlphaR1150R/1203M | TTCCTTTCCTCGTGTCCTCG |
