# Supplementary material
Source: PubMed Central journal article supplement (PMC8464406)
Supplement: NIHMS1733424-supplement-Figure_1_Supplemental_Material.pdf [file NIHMS1733424-supplement-Figure_1_Supplemental_Material.pdf]

**ESM Figure 1**

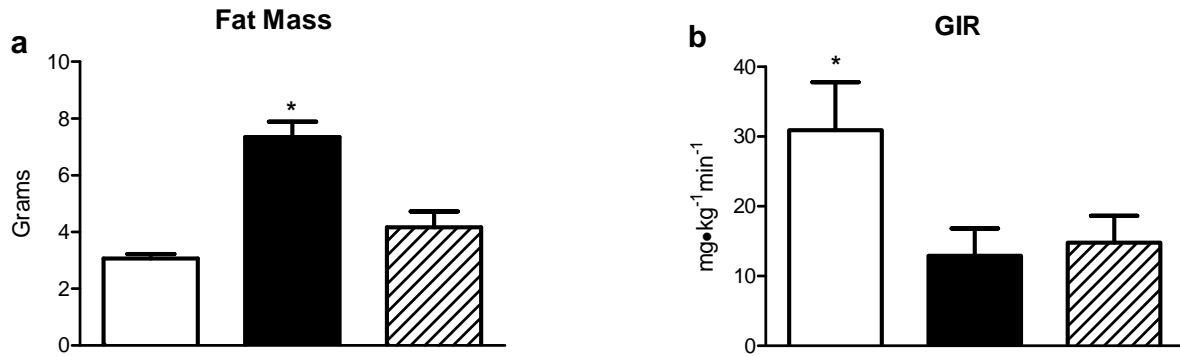

**ESM Figure 1.** Body composition and hyperinsulinaemic–euglycaemic clamp studies in mice fed either *ad libitum* chow [white], *ad libitum* HFD [black], or HFD-restricted [hatched] for 6 weeks. **a** Fat mass and **(b)** glucose infusion rate during euglycemic hyperinsulinemic clamp. (n=5/group) (\* p<0.05 SR vs. PF and VEH)
