# Supplementary material
Source: PubMed Central journal article supplement (PMC8464406)
Supplement: NIHMS1733424-supplement-Figure_2_Supplemental_Material.pdf [file NIHMS1733424-supplement-Figure_2_Supplemental_Material.pdf]

**ESM Figure 2**

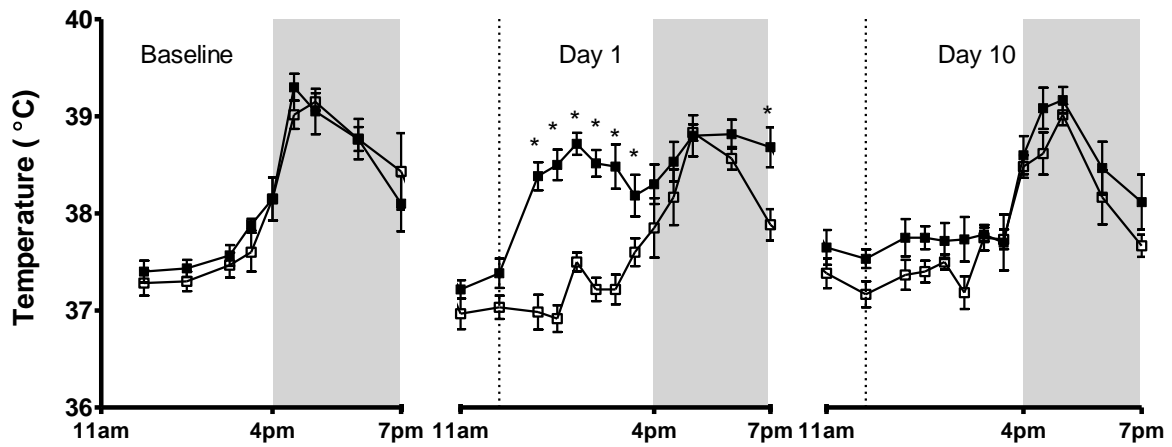

**ESM Figure 2.** iBAT temperature measurement with implantable probes during a baseline day, the first day of treatment with 10mg/kg SR141716 i.p. and the 10th day of treatment. Vehicle-treated [White], and 10mg/kg SR141716-treated [black] mice. The shaded area indicates the dark period, while the vertical line indicates time of injection. (n=6), (\* p<0.05).
