# Supplementary material
Source: PubMed Central journal article supplement (PMC8464406)
Supplement: NIHMS1733424-supplement-Figure_3_Supplemental_material.pdf [file NIHMS1733424-supplement-Figure_3_Supplemental_material.pdf]

**ESM Figure 3**

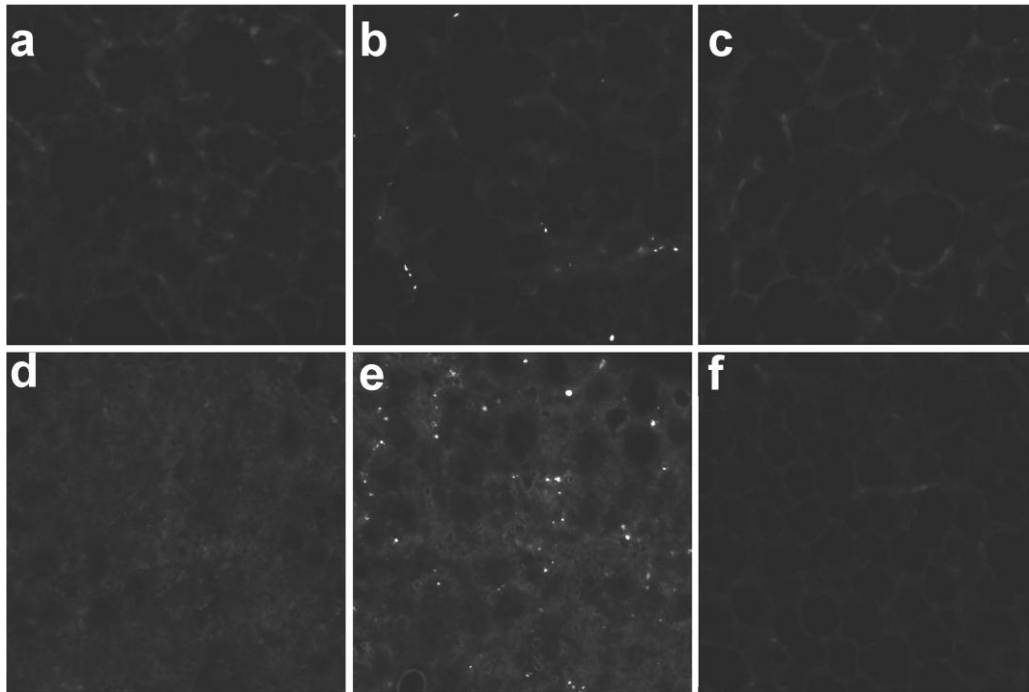

**ESM Figure 3.** Tyrosine hydroxylase protein, a marker of SNS innervation, was measured by IHC (**a-f**) in iBAT. **a** No primary antibody (control) on tissue from sham-operated vehicle-treated mice. **b** Sham-operated vehicle-treated mice. **c** Denervated vehicle-treated mice. **d** No primary antibody (control) on tissue from sham-operated SR-treated mice. **e** Sham-operated SR-treated mice. **f** Denervated SR-treated mice. **a-f** (n=4).
